# Supplementary material for: Is H19 RNA a Useful Marker of Acromegaly and Its Complications? A Preliminary Study
Source: Biomedicines. 2023 Apr 19;11(4):1211. doi: 10.3390/biomedicines11041211 (PMC10136071; doi:10.3390/biomedicines11041211)
Supplement: Supplementary file 1 [file biomedicines-11-01211-s001.zip › biomedicines-2297001-supplementary.pdf]

Table S1: Difference in H19 expression between acromegaly (1) and the control group (2); Mann-Whitney test.

|                               | n1 | n2 | p     |
|-------------------------------|----|----|-------|
| - $\Delta\Delta$ Ct H19-BACT  | 32 | 25 | 0.091 |
| - $\Delta\Delta$ Ct H19-GAPDH |    |    | 0.259 |

Table S2: Difference in H19 expression between patients without operation and radiotherapy (1), successfully cured patients (2) and the control group (3); Kruskal-Wallis test.

|                               | n1 | n2 | n3 | p     |
|-------------------------------|----|----|----|-------|
| - $\Delta\Delta$ Ct H19-BACT  | 6  | 12 | 25 | 0.493 |
| - $\Delta\Delta$ Ct H19-GAPDH |    |    |    | 0.792 |

Table S3: Difference in H19 expression between patients unoperated/ineffectively operated (1), successfully operated (2) and the controls (3); Kruskal-Wallis test.

|                               | n1 | n2 | n3 | p     |
|-------------------------------|----|----|----|-------|
| - $\Delta\Delta$ Ct H19-BACT  | 20 | 12 | 25 | 0.218 |
| - $\Delta\Delta$ Ct H19-GAPDH |    |    |    | 0.349 |

Table S4: Difference in H19 expression between patients with active acromegaly (1), controlled or cured acromegaly (2) and the control group (3); Kruskal-Wallis test.

|                               | n1 | n2 | n3 | p     |
|-------------------------------|----|----|----|-------|
| - $\Delta\Delta$ Ct H19-BACT  | 11 | 21 | 25 | 0.23  |
| - $\Delta\Delta$ Ct H19-GAPDH |    |    |    | 0.216 |

Table S5: Difference in H19 expression between patients de novo (1), SSA treated (2) and the control group (3); Kruskal-Wallis test.

|                               | n1 | n2 | n3 | p     |
|-------------------------------|----|----|----|-------|
| - $\Delta\Delta$ Ct H19-BACT  | 5  | 15 | 25 | 0.207 |
| - $\Delta\Delta$ Ct H19-GAPDH |    |    |    | 0.353 |

Table S6: Difference in H19 expression between patients de novo (1), treated with radiotherapy (2) and the control group (3); Kruskal-Wallis test.

|  | n1 | n2 | n3 | p |
|--|----|----|----|---|
|--|----|----|----|---|

|                                |   |   |    |       |
|--------------------------------|---|---|----|-------|
| - $\Delta\Delta C_t$ H19-BACT  | 5 | 4 | 25 | 0.122 |
| - $\Delta\Delta C_t$ H19-GAPDH |   |   |    | 0.579 |
